# Supplementary material for: Activation of Aryl Hydrocarbon Receptor by ITE Improves Cardiac Function in Mice After Myocardial Infarction
Source: PubMed Central journal article supplement — J Am Heart Assoc. 2021 Jun 23;10(13):e020502. doi: 10.1161/JAHA.120.020502 (PMC8403290; doi:10.1161/jaha.120.020502), 2021-06-23
Supplement: JAH3-10-e020502-s001.pdf [file JAH3-10-e020502-s001.pdf]

# **SUPPLEMENTAL MATERIAL**

**Figure S1. Time course of improvements in EF and FS obtained by echocardiography for 4 weeks.**

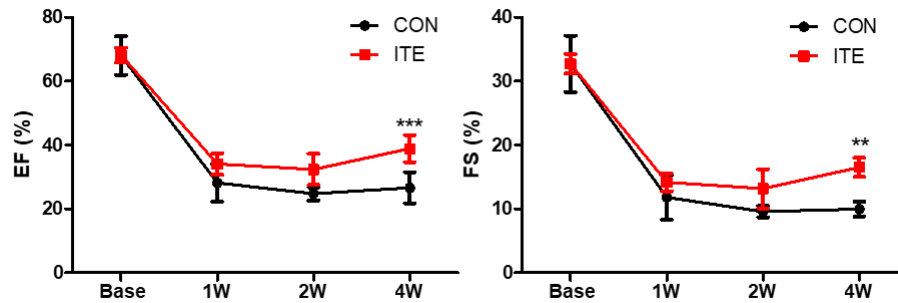

Echocardiography was performed before LAD ligation (base, n=5) and at 1-week intervals after LAD ligation in each group (control, n=5; ITE, n=10). Data are presented as the mean  $\pm$  SEM. \*\* $P < 0.01$ , and \*\*\* $P < 0.001$ . EF indicates ejection fraction and FS, fractional shortening.
